## Developmental remodeling repurposes larval neurons for sexual behaviors

### 2 in adult *Drosophila*

4 Julia A. Diamandi, Julia C. Duckhorn, Kara E. Miller, Mason Weinstock, Sofia Leone, Micaela R. Murphy,  
and Troy R. Shirangi<sup>1,\*</sup>

6

Villanova University, Department of Biology, 800 East Lancaster Ave, Villanova, PA 19085 U.S.A.

8 <sup>1</sup> Lead Contact

\* Correspondence: [troy.shirangi@villanova.edu](mailto:troy.shirangi@villanova.edu)

10

#### SUMMARY

12 Most larval neurons in *Drosophila* are repurposed during metamorphosis for functions in adult  
life, but their contribution to the neural circuits for sexually dimorphic behaviors is unknown. Here, we  
14 identify two interneurons in the nerve cord of adult *Drosophila* females that control ovipositor extrusion, a  
courtship rejection behavior performed by mated females. We show that these two neurons are present in  
16 the nerve cord of larvae as mature, sexually monomorphic interneurons. During pupal development, they  
acquire the expression of the sexual differentiation gene, *doublesex*, undergo *doublesex*-dependent  
18 programmed cell death in males, and are remodeled in females for functions in female mating behavior.  
Our results demonstrate that the neural circuits for courtship in *Drosophila* are built in part using neurons  
20 that are sexually reprogrammed from former sex-shared activities in larval life.

## 22 INTRODUCTION

Many behaviors of adult animals develop during a period of maturation, *e.g.*, puberty, as juveniles transform into adults<sup>1</sup>. The central nervous system changes dramatically during this time, including the birth of new neurons that build adult circuits<sup>2</sup>. However, in some animals like insects<sup>3</sup> and worms<sup>4</sup>, the adult nervous system is also assembled with reprogrammed neurons that were formerly active in the juvenile.

During *Drosophila* metamorphosis, most neurons of the larval central nervous system are recycled for use in adult circuits<sup>5</sup>. The moonwalker descending neuron, for instance, triggers backward locomotion in crawling larvae and is remodeled during pupal life to regulate backward walking in adult flies<sup>6</sup>. Additionally, several input and output neurons of the larval mushroom body trans-differentiate during metamorphosis and contribute to entirely different circuits in the adult brain<sup>3</sup>. Despite these cases, there are currently no examples of recycled larval neurons that contribute to sexually dimorphic behaviors of adult flies. Indeed, lineage analyses of adult neurons with sexual identity in *Drosophila* suggest that most are born post-embryonically and contribute exclusively to sexually dimorphic behaviors in adults<sup>7,8</sup>.

We previously identified a small sexually dimorphic population of interneurons in the abdominal ganglion of adult flies, the DDAG neurons, that co-express the *tailless*-like orphan nuclear receptor, *dissatisfaction* (*dsf*), and the sex differentiation gene, *doublesex* (*dsx*)<sup>9</sup>. Here, we identify two female-specific DDAG neurons that influence the extrusion of the ovipositor performed by mated females to reject courting males. These two DDAG neurons are born during embryogenesis and exist as segmental homologs of a sexually monomorphic interneuron in the larval abdominal ganglion called A26g. During early pupal life, the A26g neuron at abdominal segments five and six acquire the expression of *dsx*, undergo *dsx*-dependent programmed cell death in males, and are remodeled in females for use in the circuitry for ovipositor extrusion. Our results demonstrate that the neural circuits for sexually dimorphic behaviors in *Drosophila* include sexually reprogrammed neurons with former activities in the juvenile larva of both sexes.

## 48 RESULTS

### The DDAG neurons are anatomically diverse

*Drosophila* (*D.*) *melanogaster* females and males have eleven and three *dsf*- and *dsx*-co-expressing abdominal ganglion (DDAG) neurons, respectively, which contribute to several female- and male-specific mating behaviors (Figure 1A)<sup>9</sup>. As a first step toward associating specific courtship functions to specific

DDAG neurons, we employed a stochastic labeling method to determine the anatomy of individual  
54 DDAG neurons in females and males.

The DDAG neurons are labeled by a genetic intersectional strategy whereby a Flp recombinase,  
56 driven in *dsx*-expressing cells by *dsx<sup>LexA::p65</sup>*<sup>10</sup>, excises a transcriptional stop cassette from an upstream  
activating sequence (UAS)-regulated *myr::gfp* transgene. Expression of *myr::gfp* is activated in *dsf*-co-  
58 expressing cells by the *dsf<sup>Gal4</sup>* allele<sup>9</sup>. To stochastically label individual DDAG neurons using a similar  
intersectional strategy, we utilized *FlpSwitch*<sup>11</sup>, a Flp recombinase fused to the ligand binding domain of  
60 the human Progesterone Receptor (hPR). The activity of the FlpSwitch recombinase is dependent upon  
the presence of the progesterone mimic, mifepristone. We constructed flies carrying the *dsf<sup>Gal4</sup>* and  
62 *dsx<sup>LexA::p65</sup>* alleles, a UAS-regulated *FlpSwitch*, and a LexAop-regulated *myr::gfp* transgene containing a  
transcriptional stop cassette that is conditionally excised by the FlpSwitch recombinase. When these flies  
64 were fed food containing mifepristone for a relatively short period of time, single DDAG neurons were  
often labeled in adult flies. We examined approximately 60 and 20 single cell clones in female and male  
66 ventral nerve cords, respectively, and identified five anatomically distinct DDAG subtypes (Figure 1B).  
One of these subtypes, DDAG\_A, is present in both sexes, whereas the DDAG\_B–E subtypes are specific  
68 to females. All DDAG neuronal subtypes arborize extensively in the abdominal ganglion, whereas the  
DDAG\_C–E neurons also extend an anteriorly projecting branch that innervates thoracic neuropils. We  
70 conclude that the DDAG neuronal population consists minimally of five anatomical subtypes. Additional  
DDAG subtypes may exist that were not labeled in our experiments, and the number of neurons of each  
72 subtype is unclear.

#### 74 **DDAG\_C and DDAG\_D neurons contribute to ovipositor extrusion**

The five DDAG subtypes we identified in females may contribute to different reproductive  
76 behaviors. To develop driver lines that target subsets of DDAG neurons, CRISPR/Cas9-mediated  
homology-directed repair was used to create new alleles of *dsf* that express *LexA::p65*, or the Split-Gal4  
78 hemi-drivers, *p65AD::Zp* and *Zp::GAL4DBD*, in *dsf*-expressing cells. In a search for Split-Gal4 drivers that  
target subsets of DDAG neurons, we found that intersecting *dsf<sup>p65AD::Zp</sup>* with the enhancer line, *VT026005-*  
80 *Zp::GDBD*, labeled four female-specific DDAG neurons per hemisphere of the adult ventral nerve cord  
(Figure 2A, B). Two cell bodies are located at the posterior tip of the nerve cord and the other two are at  
82 the dorsal side of the abdominal ganglion. Labeling of individual neurons by the multicolor Flp-out  
technique<sup>12</sup> identified the two neurons at the tip as a local interneuron corresponding to the DDAG\_B  
84 subtype, whereas the two dorsally located cell bodies are the DDAG\_C and DDAG\_D neurons (Figure

2C). The DDAG\_C and DDAG\_D neurons are segmental homologs (see below) with several anatomical  
86 similarities (Video S1). Both neurons extend a primary branch off the cell body forming a “ventral arch”  
that projects across the midline and then anteriorly on the contralateral dorsal side. Unlike the DDAG\_D  
88 neuron, the DDAG\_C neuron extends a dorsally projecting medial branch off the ventral arch that gives  
rise to arbors within the abdominal ganglion. The DDAG\_D neuron is located anterior to the DDAG\_C  
90 neuron. We were unable to differentiate the two DDAG\_B neurons, however they may exhibit subtle  
anatomical differences that were undetected in our analysis and may contribute to female behavior  
92 differently.

We asked how the neurons labeled by  $dsfp^{65AD::Zp} \cap VT026005-Zp::GDBD$  influence female  
94 behavior. During courtship, unmated *D. melanogaster* females signal their willingness to mate by opening  
their vaginal plates and partially exposing the tube-like ovipositor, a behavior called “vaginal plate  
96 opening” or VPO<sup>13,14</sup>. Mated females, however, reject courting males by fully extruding their ovipositor,  
which may block copulation or male courtship drive<sup>14,15</sup>. The length of the abdomen increases when  
98 unmated females open their vaginal plates and mated females extrude their ovipositor, but the change in  
abdominal length is greater during an ovipositor extrusion than during an opening of the vaginal plates  
100 (Figure 2D). We previously showed that transient photoactivation of all DDAG neurons using the  
mVenus-tagged, red-light-gated cation channelrhodopsin, *CsChrimson::mVenus*<sup>16</sup>, caused unmated females  
102 to open their vaginal plates and mated females to extrude their ovipositor<sup>9</sup> (Figure 2D). Upon  
photoactivation,  $dsfp^{65AD::Zp} \cap VT026005-Zp::GDBD > CsChrimson::mVenus$  females fully extruded their  
104 ovipositor regardless of their mating status (Figure 2D, E; Video S2, S3). Extrusion of the ovipositor was  
penetrant and occurred largely during the photoactivation period (Figure 2F), and quantitatively similar  
106 behaviors were observed across a range of stimulus intensities (Figure 2G).

We next tested whether activity of the DDAG\_B–D neurons was required for ovipositor extrusion  
108 in mated females. In addition to labeling a subset of female-specific DDAG neurons, the intersection of  
 $dsfp^{65AD::Zp}$  and  $VT026005-Zp::GDBD$  labels neurons in the brain (Figure 2A). To target the DDAG\_B–D  
110 neurons specifically, we intersected  $dsfp^{65AD::Zp} \cap VT026005-Zp::GDBD$  with  $dsx^{LexA::p65}$  (Figure 3A) and  
used the three-way intersection to suppress the activity of the DDAG\_B–D neurons by driving the  
112 expression of a GFP-tagged version of the inwardly rectifying K<sup>+</sup> channel, *Kir2.1*<sup>17</sup> (Figure 3B). Unmated  
females expressing *Kir2.1::gfp* in the DDAG\_B–D neurons copulated with males at a rate that was similar  
114 to control unmated females (Figure 3C) and opened their vaginal plates during courtship at a frequency  
comparable to control females (Figure 3D). However, mated  $dsfp^{65AD::Zp} \cap VT026005-Zp::GDBD \cap dsx^{LexA::p65}$   
116  $> Kir2.1::gfp$  females extruded their ovipositor during courtship with a modest reduction in frequency

(Figure 3E) and laid fewer eggs (Figure 3F) compared to controls. Thus, the activity of one or more DDAG  
118 subtypes labeled by the  $dsf^{65AD::Zp} \cap VT026005-Zp::GDBD$  intersection contribute to ovipositor extrusion  
and egg laying in mated females. The modest effects on ovipositor extrusion and egg laying frequency  
120 from silencing these neurons may suggest the involvement of additional neural circuit elements.

To determine the specific DDAG neuronal subtype that influences ovipositor extrusion, we  
122 randomly expressed *CsChrimson::mVenus* in one or more neurons labeled by the  $dsf^{65AD::Zp} \cap VT026005-$   
*Zp::GDBD* intersection using a Flp-based approach. By stochastically expressing a Flp recombinase under  
124 the control of a heat-inducible promoter, we randomly excised a transcriptional stop cassette from a UAS-  
regulated *CsChrimson::mVenus* transgene whose expression was driven by  $dsf^{65AD::Zp} \cap VT026005-$   
126 *Zp::GDBD*. Using this strategy, we generated a population of mosaic females (n=103) that randomly  
expressed *CsChrimson::mVenus* in one or more of the DDAG neurons labeled by  $dsf^{65AD::Zp} \cap VT026005-$   
128 *Zp::GDBD*, producing 18 distinct groups of mosaic females (Figure 2H). Most of these females expressed  
*CsChrimson::mVenus* in one or two DDAG neurons (Figure 2H inset). Females were tested in an  
130 optogenetic activation experiment before their ventral nerve cords were dissected and stained with  
antibodies to GFP to reveal the identity of DDAG neurons that expressed the *CsChrimson::mVenus* in each  
132 female.

All mosaic females expressing *CsChrimson::mVenus* specifically in a bilateral pair of DDAG\_C  
134 (n=5) or DDAG\_D (n=4) neurons extruded their ovipositor during bouts of photoactivation (Figure 2H, I;  
Video S4, S5). Unilateral activation of the DDAG\_C (n=15) or DDAG\_D (n=13) neurons caused a change  
136 in abdominal posture with no extrusion of the ovipositor (Figure 2H, Video S6, S7). It is unclear if the  
postural change is associated with any displacement of the vaginal plates. Photoactivation of a unilateral  
138 DDAG\_B neuron (n=16) failed to evoke any obvious behavior (Figure 2H, Video S8). We did not obtain  
mosaic females that expressed *CsChrimson::mVenus* specifically in a bilateral pair of DDAG\_B neurons  
140 (Figure 2H). However, bilateral activation of the DDAG\_B neurons did not modify the postural change  
induced by photoactivation of a single DDAG\_C or DDAG\_D neuron (Figure 2H, Video S9). Taken  
142 together, these results demonstrate that the DDAG\_C and DDAG\_D neurons contribute to ovipositor  
extrusion in mated females. A functional difference between the DDAG\_C and DDAG\_D neurons was  
144 not detected in our experiments. The contribution of the DDAG\_B neurons to female behavior is  
currently unclear.

146

**The DDAG neurons originate as embryonic-born neurons in the larval ventral nerve cord**

148            In each hemisphere of the late third-instar larval abdominal ganglion, the *dsf<sup>Gal4</sup>* allele labels two  
segmentally repeating interneurons from A1 to A8, and four interneurons at the terminal segments  
150 (Figure 4A). The number and gross anatomy of these twenty neurons is similar in female and male larvae,  
in newly hatched larvae, and in larvae aged 24 and 48 hours after hatching (Figure 4A), indicating that the  
152 neurons are born during embryogenesis, and that the expression of the *dsf<sup>Gal4</sup>* allele is stable through  
larval life. We posited that a subset of these twenty *dsf*-expressing neurons in each hemisphere of the  
154 larval abdominal ganglion become the DDAG neurons of adult females and males. We tested this by  
visualizing *dsf<sup>Gal4</sup>* and *dsx<sup>LexA::p65</sup>* expression in the abdominal ganglion of pupae staged at several times  
156 during pupal development. From 0 to 18 hours after puparium formation (APF), the twenty *dsf*-  
expressing neurons we observed in the abdominal ganglion of larvae were identifiable in the ventral  
158 nerve cord of female and male pupae (Figure 4B, C). By 18 hours APF, approximately eleven of these  
neurons had gained *dsx<sup>LexA::p65</sup>* expression in both sexes (Figure 4B, C). In neuromeres A3–A7, one of the  
160 two *dsf*-expressing neurons in each hemisegment was labeled by *dsx<sup>LexA::p65</sup>*, and all six *dsf*-expressing  
neurons in A8 and the terminal segments co-expressed *dsx<sup>LexA::p65</sup>* (Figure 4B). The gain of *dsx<sup>LexA::p65</sup>*  
162 expression in *dsf*-expressing neurons occurred gradually and monomorphically in both sexes from 0 to 18  
hours APF, but by 36 hours APF, approximately eight *dsf<sup>Gal4</sup>* and *dsx<sup>LexA::p65</sup>* co-expressing neurons were  
164 absent in males (Figure 4C). We previously demonstrated that the difference in DDAG neuron number  
between adult females and males was due to *dsx*-dependent apoptosis in males<sup>9</sup>, indicating that the loss  
166 of *dsf<sup>Gal4</sup>* and *dsx<sup>LexA::p65</sup>* co-expressing neurons in male pupae aged 36 hours APF is due to cell death. At 48  
hours APF, approximately eleven and three *dsf<sup>Gal4</sup>* and *dsx<sup>LexA::p65</sup>* co-expressing neurons were present in  
168 the abdominal ganglion of females and males, respectively, corresponding to the number of DDAG  
neurons in adults (Figure 4C).

170            To further test that the DDAG neurons are derived from *dsf*-expressing neurons in the abdominal  
ganglion of larvae, we repeated the Flp-based genetic intersection between *dsf<sup>Gal4</sup>* and *dsx<sup>LexA::p65</sup>*, but this  
172 time, we used *UAS-FlpSwitch* to conditionally activate the recombinase in *dsf<sup>Gal4</sup>*-expressing cells only  
during larval life. Larvae were fed mifepristone, causing the FlpSwitch to excise a transcriptional stop  
174 cassette from a LexAop-controlled *myr::gfp* transgene in larval cells labeled by the *dsf<sup>Gal4</sup>*. The *dsx<sup>LexA::p65</sup>*  
allele was used to drive the expression of *myr::gfp* in *dsx*-expressing neurons of adults. GFP expression  
176 was observed in the DDAG neurons of adults of both sexes (Figure S1), consistent with the notion that the  
DDAG neurons originate as *dsf*-expressing neurons in the larval abdominal ganglion. We conclude that  
178 the entire population of DDAG neurons are embryonic-born *dsf*-expressing neurons that are present in  
larvae of both sexes. During pupal life, approximately eleven *dsf*-expressing neurons in the abdominal

180 ganglion of both sexes gain *dsx* expression (Figure 4B, C), eight of which are subsequently lost in males  
due to *dsx*-mediated apoptosis<sup>9</sup>.

182

### Two segmental homologs of the A26g neuron in larvae become the DDAG\_C and DDAG\_D neurons of adult females

184 We next sought to identify the larval counterparts of specific DDAG neuronal subtypes. We  
186 found that the intersection of *dsfp<sup>65AD::Zp</sup>* and *VT026005-Zp::GDBD* used above to target the DDAG\_B–D  
subtypes labeled a single, bilateral, and segmentally repeating *dsf*-expressing interneuron in segments  
188 A4–A6 of the larval abdominal ganglion of both sexes (Figure 5A, B). Stochastic labeling of individual  
neurons labeled by the Split-Gal4 demonstrated that these neurons correspond to the A26g interneuron  
190 (Figure 5C; J. Truman, personal communication).

The A26g neuron of larvae and the DDAG\_C and DDAG\_D neurons of adult females display  
192 several anatomical similarities (Video S1). All three neurons have a cell body on the dorsal side of the  
abdominal ganglion, a ventral arch, and a dorsally-located contralateral branch that projects anteriorly.  
194 We therefore hypothesized that two segmental homologs of the A26g neuron labeled in larvae by  
*dsfp<sup>65AD::Zp</sup> ∩ VT026005-Zp::GDBD* metamorphose into the DDAG\_C and DDAG\_D neurons of adult  
196 females. To test this, we first visualized the A26g neurons labeled by *dsfp<sup>65AD::Zp</sup> ∩ VT026005-Zp::GDBD*  
over the course of pupal development in females and probed DSX-F protein expression. At the onset of  
198 pupariation, the A26g neurons at A4–A6 were labeled by *dsfp<sup>65AD::Zp</sup> ∩ VT026005-Zp::GDBD* but none of  
them co-expressed DSX-F (Figure 5D). By 24 hours APF, however, the A26g neuron at A5 and A6, but not  
200 A4, had gained DSX-F expression (Figure 5E). Two additional neurons, one at A7 and one at A8, were  
labeled by the Split-Gal4 and both were also marked by DSX-F (Figure 5E). By 48 hours APF, the gross  
202 morphology of the neurons labeled by *dsfp<sup>65AD::Zp</sup> ∩ VT026005-Zp::GDBD* had transformed to the likeness  
of the DDAG\_B–D neurons of adult females (Figure 5F, G). The cell bodies of the DSX-F-expressing A5  
204 and A6 neurons were positioned on the dorsal side of the abdominal ganglion where the soma of the  
DDAG\_D and DDAG\_C neurons are normally located, and the A7 and A8 cell bodies were at the tip of  
206 the nerve cord, where the DDAG\_B neurons are found. By adulthood, the DSX-F-non-expressing A26g  
neuron at A4 had disappeared (Figure 5G). The DDAG\_D neuron is anterior to the DDAG\_C neuron,  
208 suggesting that the A26g neuron at segments A5 and A6 transform into the DDAG\_D and DDAG\_C  
neurons, respectively. The DDAG\_B neurons are likely derived from *dsf*-expressing neurons at A7 and A8  
210 that become marked by *dsfp<sup>65AD::Zp</sup> ∩ VT026005-Zp::GDBD* during pupal development prior to 24 hours  
APF. The larval counterparts of the DDAG\_B neurons are currently not known.

212 To confirm that the A26g neurons in larvae become the DDAG\_C and DDAG\_D neurons, we  
repeated the FlpSwitch-based genetic intersection we described above but between *dsx<sup>LexA::p65</sup>* and  
214 *dsfp<sup>65AD::Zp</sup> ∩ VT026005-Zp::GDBD*. The Split-Gal4 was used to drive the expression of *UAS-FlpSwitch* in the  
A26g neurons and larvae were fed mifepristone to activate the FlpSwitch during larval life. The FlpSwitch  
216 then excised a transcriptional stop cassette from a LexAop-controlled *myr::gfp* transgene driven by  
*dsx<sup>LexA::p65</sup>*. The DDAG\_C and DDAG\_D neurons of adult females were labeled by GFP (Figure 5H),  
218 further confirming that the DDAG\_C and DDAG\_D neurons are indeed derived from two segmental  
homologs of the A26g neurons in larvae.

220

### DSF and DSX-M regulate the survival of the DDAG\_C and DDAG\_D neurons

222 We previously showed that DSF activity is required for the survival of a subset of DDAG neurons  
in females, whereas DSX-M promotes the cell death of female-specific DDAG neurons in males<sup>9</sup>. We  
224 sought to determine how DSF and DSX contribute to the development of the DDAG\_C and DDAG\_D  
neurons specifically. The *dsfp<sup>65AD::Zp</sup> ∩ VT026005-Zp::GDBD* intersection was used to visualize the  
226 DDAG\_C and DDAG\_D neurons while driving the expression of a validated UAS-regulated short  
hairpin/miRNA (ShmiR) targeting *dsf* or *dsx* transcripts. *Dsx* transcripts are sex-specifically spliced and  
228 translated to produce female- and male-specific isoforms of DSX proteins<sup>18</sup>. Knock-down of *dsx*  
transcripts in females did not cause any obvious change in DDAG\_C or DDAG\_D anatomy (Figure S2A,  
230 B), whereas depletion of male-specific *dsx* transcripts caused a gain of DDAG\_C and DDAG\_D neurons  
with an arborization pattern like that of wild-type females (Figure S2A', B'). Female-like DDAG neurons  
232 are resurrected in males with the ectopic expression of the cell death inhibitor, P35<sup>9</sup>, suggesting that the  
gain of the DDAG\_C and DDAG\_D neurons in *dsfp<sup>65AD::Zp</sup> ∩ VT026005-Zp::GDBD > UAS-dsx\_ShmiR* males  
234 is due to loss of cell death. Optogenetic activation of the resurrected DDAG\_C and DDAG\_D neurons in  
*dsfp<sup>65AD::Zp</sup> ∩ VT026005-Zp::GDBD > UAS-dsx\_ShmiR* males induced an extrusion of the male's terminalia  
236 (Video S10), a behavior reminiscent of ovipositor extrusion in mated females. Consistent with the absence  
of an anatomical phenotype in their DDAG\_C and DDAG\_D neurons, photoactivation of *dsfp<sup>65AD::Zp</sup> ∩*  
238 *VT026005-Zp::GDBD > UAS-dsx\_ShmiR* females caused an extrusion of the ovipositor (Figure S2G, Video  
S11).

240 In contrast, the DDAG\_C and DDAG\_D neurons were lost in *dsfp<sup>65AD::Zp</sup> ∩ VT026005-Zp::GDBD >*  
*UAS-dsf\_ShmiR* females (Figure S2A, C) and in females carrying loss-of-function mutations in *dsf* (Figure  
242 S2D, E). When *dsfp<sup>65AD::Zp</sup> ∩ VT026005-Zp::GDBD* was used to drive the expression of *UAS-dsf\_ShmiR* and  
*UAS-CsChrimson::mVenus*, females failed to extrude their ovipositor during bouts of photoactivation



244 (Figure S2G, Video S12). To confirm that the loss of the DDAG\_C and DDAG\_D neurons in *dsf* mutant  
females was due to cell death, we used *dsf<sup>Gal4</sup>* to drive the expression of *UAS-P35*. Indeed, blockage of cell  
246 death by ectopic expression of P35 in *dsf*-expressing neurons of *dsf* mutant females rescued the DDAG\_C  
and DDAG\_D neurons (Figure S2D–F). The rescued DDAG\_C and DDAG\_D neurons appear to lack  
248 contralateral ascending projections, suggesting that *dsf* may contribute to neuronal development beyond  
acting as a pro-survival factor. Knock-down of *dsf* transcripts in *dsf<sup>65AD::Zp</sup> ∩ VT026005-Zp::GDBD > UAS-*  
250 *dsf\_ShmiR* males had no effect on the survival of the DDAG\_B–D neurons (Figure S2A', C'). Taken  
together, these data suggest that DSF promotes the survival of the DDAG\_C and DDAG\_D neurons in  
252 females, whereas DSX-M promotes their cell death in males. Knock-down of *dsf* transcripts in *dsf<sup>65AD::Zp</sup> ∩*  
*VT026005-Zp::GDBD > UAS-dsf\_ShmiR* larvae had no obvious effect upon the development of the A26g  
254 neurons (Figure S2H), suggesting that DSF regulates the survival of the DDAG\_C and DDAG\_D neurons  
during pupal development.

256

## DISCUSSION

258 Many neurons of the *Drosophila* larval nervous system persist through metamorphosis and  
contribute to adult neural circuits, yet their contribution to sexually dimorphic adult behaviors is unclear.  
260 In this paper, we address this gap with two key findings: First, we identify two interneurons in the  
abdominal ganglion of adult females, the DDAG\_C and DDAG\_D neurons, that contribute to ovipositor  
262 extrusion, a behavior performed primarily by mated and mature females to reject courting males. The  
neural circuitry that mediates ovipositor extrusion in mated females has been partially delineated  
264 recently<sup>15</sup>. In response to the male's song, *dsx*-expressing pC2l neurons activate a descending neuron  
called DNp13 that triggers the motor circuits in the abdominal ganglion for ovipositor extrusion<sup>15</sup>.  
266 Interestingly, the ability of DNp13 to induce ovipositor extrusion in mated but not unmated females  
depends upon mechanosensory input during ovulation<sup>15</sup>. The DDAG\_C/D neurons may function  
268 downstream of DNp13 and ovulation-sensing mechanosensory neurons, perhaps integrating their inputs,  
but upstream of motor circuits for ovipositor extrusion.

270 Photoactivation of all DDAG neurons induces vaginal plate opening in unmated females and  
ovipositor extrusion in mated females<sup>9</sup>. Activating the DDAG\_B–D neurons, however, induces ovipositor  
272 extrusion regardless of mating status (Figure 2D). This suggests the possibility that the DDAG\_A or  
DDAG\_E subtypes or both integrate mating status to inhibit DDAG\_C/D-driven ovipositor extrusion in  
274 unmated females. Testing this will require the development of new genetic tools that provide access to  
the DDAG\_A and DDAG\_E subtypes.

276           Second, we find that the DDAG\_C/D neurons are present in the larval abdominal ganglion as  
mature sexually monomorphic neurons corresponding to two segmental homologs of the A26g neuron.  
278   The function of A26g in larvae is currently unknown. During metamorphosis, the A26g neurons at  
segments A5 and A6 acquire *dsx* expression in both sexes and are then remodeled in females to become  
280   the DDAG\_D and DDAG\_C neurons, respectively. In males, expression of DSX-M promotes  
programmed cell death of the A26g neurons during pupal life<sup>9</sup>, whereas DSF activity is necessary for the  
282   survival the A26g neurons in females. The mechanism by which DSF and DSX-M regulate A26g apoptosis  
is unknown. One possibility is that DSX-M antagonizes DSF function in males, thereby allowing the  
284   neurons to die during pupal life.

          Our results demonstrate that the neural circuits for courtship behavior in *Drosophila* are  
286   constructed in part from sex-non-specific larval neurons that are sexually reprogrammed during  
metamorphosis for functions in adults (Figure 6). Similar observations have been made in *C. elegans*  
288   where sex-specific patterns of synaptic connectivity in adults develop from neurons in juvenile worms  
with sexually monomorphic connections<sup>19</sup>. How much of the circuitry for dimorphic courtship behaviors  
290   in flies is built from reprogrammed larval neurons? Lineage analyses of neurons with sexual identity in  
the adult brain and thoracic ganglia have shown that most, if not all, are born during post-embryonic  
292   neurogenesis and function only in adults<sup>7,8</sup>. However, this may differ in the abdominal nervous system.  
The abdominal ganglion of adult flies is largely specialized for functions in reproduction, and indeed the  
294   majority of *dsx*-expressing neurons are located in the abdominal ganglion<sup>20-22</sup>. Some of these neurons are  
specific to adults and are born during larval and pupal life from two terminal abdominal neural stem  
296   cells, *i.e.*, neuroblasts, with sex-specific patterns of neurogenesis<sup>23-25</sup>. But many others, like the DDAG  
neurons, are likely to be derived from embryonic lineages. In contrast to the brain and thoracic nervous  
298   system, the vast majority of neuroblasts in the abdominal neuromeres (*e.g.*, A2–A8) finish producing  
neurons by the end of embryonic life and add very few adult-specific neurons<sup>23</sup>. The contribution of  
300   remodeled larval neurons to the circuits for sexually dimorphic behaviors may thus be relatively greater  
in the abdominal ganglion than in other regions of the fly nervous system.

302           Insect neurons exhibit impressive plasticity as the central nervous system metamorphoses from  
its larval to adult form. Some larval neurons undergo programmed cell death, but most persist through  
304   pupal life to contribute to adult circuits<sup>5</sup>. Larval neurons that persist remodel their axonal and dendritic  
arbors to regulate similar processes in adults<sup>3,6,26-30</sup> or trans-differentiate to obtain altogether different  
306   functions<sup>3,31</sup>. Courtship and neuronal sexual identity are specific to adults, suggesting that the A26g-to-  
DDAG\_C/D transformation may be a case of trans-differentiation. How the A26g neurons acquire sexual

308 identity and become repurposed during metamorphosis may provide a system to study the regulatory  
mechanisms underlying developmental reprogramming of the nervous system.

310

### ACKNOWLEDGEMENTS

312 We thank J. Truman (University of Washington) for identifying the A26g neuron and suggesting driver  
lines to target them in larvae; J. Cande and D. Stern (HHMI) for contributing *dsf* alleles; Y. Ding  
314 (University of Pennsylvania), J. Lillvis (HHMI), and E. Preger-Ben Noon (Technion) for helpful  
discussions and comments on the manuscript; and A. McStravog for administrative assistance. T.R.S. is  
316 supported by the National Science Foundation (IOS-1845673).

### 318 AUTHOR CONTRIBUTIONS

Conceptualization, T.R.S.; Investigation, J.A.D, J.C.D, K.E.M, M.W., S.L., M.R.M., T.R.S.; Writing –  
320 Original Draft, T.R.S., J.A.D.

### 322 DECLARATION OF INTERESTS

The authors declare no competing interests.

324

### MAIN TEXT FIGURE LEGENDS

326 **Figure 1. The DDAG neurons are anatomically diverse.** (A) Confocal images of ventral nerve cords  
(VNCs) from *dsf<sup>Gal4</sup> ∩ dsx<sup>LexA::p65</sup> > myr::gfp* males and females. GFP-expressing neurons are labeled in black  
328 and DNCad (neuropil) is shown in light gray. (B) Confocal images of individual DDAG neurons from  
*dsf<sup>Gal4</sup>/LexAop-frt.stop-myr::gfp; dsx<sup>LexA::p65</sup>/UAS-hPR::Flp* males and females fed food containing  
330 mifepristone for about two hours during adulthood. A total of one and five DDAG subtypes were  
identified in males and females, respectively. Coronal and sagittal views of each neuron is shown.

332

**Figure 2. The DDAG\_C and DDAG\_D neurons contribute to ovipositor extrusion in unmated and**  
334 **mated females.** (A and B) Confocal images of brains and VNCs from *dsf<sup>65AD::Zp</sup> ∩ VT026005-ZP::GDBD >*  
*CsChrimson::mVenus* females and males probed with antibodies to GFP. *CsChrimson::mVenus*-expressing  
336 neurons are labeled in black and DNCad (neuropil) is shown in light gray. Four VNC neurons are labeled  
per hemisphere. (C) Confocal images of individual DDAG\_B, DDAG\_C, and DDAG\_D neurons from  
338 *dsf<sup>65AD::Zp</sup> ∩ VT026005-ZP::GDBD >* multicolor flp-out females. Arrows point to the ventral arch of the  
DDAG\_C and DDAG\_D neurons. The DDAG\_C neuron has a medial branch off the ventral arch that is

340 absent in the DDAG\_D neuron. (D) Artificial activation of the DDAG\_B–D neurons induces ovipositor  
extrusion in unmated and mated females. The change in abdominal length when an unmated (black  
342 squares) or mated (magenta squares) *Canton S* female performs vaginal plate opening or ovipositor  
extrusion, respectively, during courtship is shown. Photoactivation of the entire DDAG population in  
344 unmated (black triangles) and mated (magenta triangles) females induces a change in abdominal length  
like that observed when *Canton S* females open their vaginal plates or extrude their ovipositor,  
346 respectively<sup>9</sup>. Photoactivation of the DDAG\_B–D subtypes in unmated (black circles) and mated  
(magenta circles) females induces a change in abdominal length like that observed when *Canton S* mated  
348 females extrude their ovipositor. (E) Still-frame images of decapitated *dsfp<sup>65AD</sup>::Zp*  $\cap$  *VT026005-ZP::GDBD* >  
*CsChrimson::mVenus* unmated (top) and mated (bottom) females before (left) and during (right)  
350 illumination with 10.5  $\mu$ W/mm<sup>2</sup> of red light to activate DDAG\_B–D neurons. In both cases,  
photoactivation results in ovipositor extrusion. (F) Average fraction of time unmated and mated females  
352 extrude their ovipositor during (red) and before or after (black) three sequential 15-second bouts of  
photoactivation (*i.e.*, oe index) of the DDAG subtypes labeled by *dsfp<sup>65AD</sup>::Zp*  $\cap$  *VT026005-ZP::GDBD*. Lights  
354 are off for 45 seconds before each bout. Indices are above zero when lights are off because it takes a few  
seconds for females to fully retract the ovipositor once the photoactivation bout ends. (G) The change in  
356 abdominal length upon photoactivation of *dsfp<sup>65AD</sup>::Zp*  $\cap$  *VT026005-ZP::GDBD* > *CsChrimson::mVenus* in  
unmated (black) and mated (magenta) females is similar across increasing light intensities. (H) Histogram  
358 showing the number of unmated mosaic females in which *CsChrimson::mVenus* was either not expressed  
(first column) or expressed randomly in DDAG\_B–D neurons uni- or bilaterally (columns 2–19) via  
360 expression of a heat-inducible Flp recombinase. Most mosaic females expressed *CsChrimson::mVenus* not  
at all or in one or two DDAG neurons (inset histogram). Upon photoactivation, females performed either  
362 no behavior (black bars), an abdominal postural change (orange bars), or an ovipositor extrusion (blue  
bars). All females within each expression category along the x-axis performed similar behaviors upon  
364 photoactivation. (I) Artificial bilateral activation of the DDAG\_C or DDAG\_D neurons induces ovipositor  
extrusion. No other neurons were activated in these females. (right) Still-frame images of mosaic  
366 *dsfp<sup>65AD</sup>::Zp*  $\cap$  *VT026005-ZP::GDBD* > *CsChrimson::mVenus* unmated females before (left) and during (right)  
illumination with 10.5  $\mu$ W/mm<sup>2</sup> of red light to activate the DDAG\_C or DDAG\_D neurons bilaterally and  
368 specifically. (left) *CsChrimson::mVenus* expression in the posterior nerve cord of the females shown in the  
still frames. (D, F, G) show individual points, mean, and SD. A one-way ANOVA Turkey-Kramer test for  
370 multiple comparisons was used to measure significance ( $P < 0.05$ ). Same letter indicates no significant  
difference ( $P > 0.05$ ).

372

**Figure 3. Activity of neurons labeled by  $dsf^{65AD::Zp} \cap VT026005-ZP::GDBD$  is necessary for ovipositor extrusion and egg laying in mated females.** (A) Confocal images of the brain and VNC from  $dsf^{65AD::Zp} \cap VT026005-ZP::GDBD \cap dsx^{LexA::p65} > myr::gfp$  females. GFP-expressing neurons are labeled in black and DNCad (neuropil) is shown in light gray. (B) Confocal image of a VNC from  $dsf^{65AD::Zp} \cap VT026005-ZP::GDBD \cap dsx^{LexA::p65} > kir2.1::gfp$  females. Kir2.1::GFP-expressing neurons are labeled in black and DNCad (neuropil) is shown in light gray. (C, D) Unmated females with inhibited DDAG\_B–D neurons using  $kir2.1::gfp$  are similarly receptive to male courtship relative to two control genotypes. (C) Fraction of unmated females that mated with a naïve *Canton S* male over a 30-min period. Significance ( $P < 0.05$ ) was measured using a Logrank test. n.s. = not significant. (D) Number of times an unmated female opened her vaginal plates per minute of active courtship from a naïve *Canton S* male. (E, F) Ovipositor extrusion and egg laying are reduced in mated females with inhibited DDAG\_B–D. (E) Number of times a mated female extruded her ovipositor per minute of active courtship from a naïve *Canton S* male. (F) Number of eggs laid by a mated female 24-hr after mating. (D–F) show individual points, mean, and SD. A one-way ANOVA Turkey-Kramer test for multiple comparisons was used to measure significance ( $P < 0.05$ ). Same letter indicates no significant difference ( $P > 0.05$ ).

388

**Figure 4. The DDAG neurons originate as embryonic-born  $dsf$ -expressing interneurons in the abdominal ganglion of larvae.** (A) Confocal images of central nervous systems (CNSs) from  $dsf^{Gal4} > myr::gfp$  larvae at various hours post-hatching (hph). GFP-expressing neurons are labeled in black and DNCad (neuropil) is shown in light gray.  $dsf^{Gal4}$  labels 20 interneurons per hemisphere in the abdominal ganglion of female and male larvae. These neurons are observed in newly hatched larvae and are thus born during embryogenesis. The sex of the larvae at 0–2 and 24–26 hph was not determined. (B) A subset of  $dsf$ -expressing neurons in the abdominal ganglion of larvae acquire  $dsx$  expression during pupal life. (left) Confocal images of the VNC from  $dsf^{Gal4} > myr::rfp$ ,  $dsx^{LexA::p65} > myr::gfp$  female and male pupae at 18 hours after puparium formation (APF). RFP-expressing neurons are labeled in magenta, GFP-expressing neurons are in green, and DNCad (neuropil) is shown in blue. (right)  $dsf^{Gal4}$ -expressing neurons at each abdominal neuromere are shown. Neurons that co-express  $dsx^{LexA::p65}$  are labeled with an asterisk. From A3–A7, one of two  $dsf^{Gal4}$ -expressing neurons are also positive for  $dsx^{LexA::p65}$ , whereas all  $dsf^{Gal4}$ -expressing neurons posterior to A7 co-express  $dsx^{LexA::p65}$ . An illustration summarizing the expression of  $dsf^{Gal4}$  and  $dsx^{LexA::p65}$  in the abdominal ganglion at 18 hours APF is shown to the right. Cells that co-express  $dsf^{Gal4}$  and  $dsx^{LexA::p65}$  are shown in magenta. (C) The number of  $dsf^{Gal4}$ -expressing neurons (circles) and  $dsf^{Gal4-}$ ,

404 *dsx<sup>LexA::p65</sup>*-co-expressing (*i.e.*, DDAG) neurons (diamonds) per hemisphere in the abdominal ganglion of  
females and males is shown. From 0–18 hours APF, both sexes have ~20 *dsf<sup>Gal4</sup>*-expressing neurons, and  
406 the number of *dsf<sup>Gal4</sup>*- and *dsx<sup>LexA::p65</sup>*-co-expressing neurons gradually increases to ~11 neurons. Between  
18–48 hours APF, ~8 DDAG neurons gradually disappear in males but not in females leaving a total of 11  
408 and 3 DDAG neurons in females and males, respectively. Individual points, mean, and SD are shown.

410 **Figure 5. Two A26g neurons in the larval abdominal ganglion become the DDAG\_C and DDAG\_D**  
**neurons of adult females.** (A, B) Confocal images of larval CNSs from *dsf<sup>65AD::Zp</sup> ∩ VT026005-ZP::GDBD >*  
412 *myr::gfp* (A) females and (B) males. GFP-expressing neurons are labeled in black and DNCad (neuropil) is  
shown in light gray. The A26g neuron is labeled in segments A4–A6. (C) A confocal image of a single  
414 A26g neuron at A4 or A5 using the multicolor Flp-out technique. Coronal and sagittal views are shown.  
(D–G) Confocal images of the abdominal ganglion at various time points after puparium formation (APF)  
416 from *dsf<sup>65AD::Zp</sup> ∩ VT026005-ZP::GDBD > myr::gfp* females. GFP-expressing neurons are labeled in green  
and DSX-F-expressing neurons are labeled in magenta. (D) At 0 hours APF, the A26g neuron at A4–A6 is  
418 labeled by GFP, but none of them express DSX-F. (E) At 24 hours APF, the A26g neuron at A5 and A6  
express DSX-F. Two additional neurons at A7 and A8 are labeled by *dsf<sup>65AD::Zp</sup> ∩ VT026005-ZP::GDBD*,  
420 both of which express DSX-F. (F) By 48 hours APF, the anatomy of the neurons labeled by *dsf<sup>65AD::Zp</sup> ∩*  
*VT026005-ZP::GDBD* is similar to that of the DDAG\_B–D neurons of adults. (G) By adulthood, only  
422 neurons at A5 (DDAG\_D), A6 (DDAG\_C), A7, and A8 (DDAG\_B) are labeled by GFP and DSX-F. (H)  
Confocal images of posterior VNCs from *dsf<sup>65AD::Zp</sup> ∩ VT026005-ZP::GDBD > UAS-hPR::Flp, dsx<sup>LexA<sup>p65</sup></sup> >*  
424 *LexAop2-frt.stop-myr::gfp* adult females fed ethanol- or mifepristone-containing food during larval life.  
GFP-expressing neurons are labeled in black and DNCad (neuropil) is shown in light gray. Expression of  
426 GFP in the DDAG\_C and DDAG\_D neurons of adults indicates that the cells existed among the *dsf<sup>65AD::Zp</sup> ∩*  
*VT026005-ZP::GDBD*-expressing neurons in the larval abdominal ganglion. Although the Split-Gal4  
428 labels the DDAG\_B neurons after larval life (*i.e.*, between 0–24 hours APF), the DDAG\_B neurons were  
also labeled in these experiments. This was likely due to the perdurance of residual mifepristone after  
430 pupariation.

432 **Figure 6. A26g neurons in larvae become the DDAG\_D and DDAG\_C neurons in females but undergo**  
***dsx*-dependent cell death in males.** A model summarizing the results described in this paper. See text for  
434 details.

436 STAR METHODS

KEY RESOURCES TABLE

| REAGENT or RESOURCE                                                                                                | SOURCE                               | IDENTIFIER                       |
|--------------------------------------------------------------------------------------------------------------------|--------------------------------------|----------------------------------|
| Antibodies                                                                                                         |                                      |                                  |
| rabbit anti-GFP                                                                                                    | Invitrogen                           | Cat#A11122; RRID:AB_221569       |
| rat anti-DN-cadherin                                                                                               | Developmental Studies Hybridoma Bank | Cat#DN-Ex#8; RIDD:AB_528121      |
| rabbit anti-DSX-F                                                                                                  | Peng et al. <sup>32</sup>            | N/A                              |
| mouse anti-DSX-M                                                                                                   | Peng et al. <sup>32</sup>            | N/A                              |
| mouse anti-HA.11                                                                                                   | BioLegend                            | Cat#MMS-101P; RRID:AB_291261     |
| rat anti-FLAG                                                                                                      | Novus Biologicals                    | Cat#NBP1-06712; RRID:1625981     |
| Fluorescein (FITC)-conjugated donkey anti-rabbit                                                                   | Jackson ImmunoResearch               | Cat#711-095-152; RIDD:AB_2315776 |
| goat anti-rat AlexaFluor 647                                                                                       | Invitrogen                           | Cat#A21247; RRID:AB_141778       |
| donkey anti-rat AlexaFluor 568                                                                                     | Invitrogen                           | Cat#A78946; RRID:AB_2910653      |
| donkey anti-mouse AlexaFluor 647                                                                                   | Invitrogen                           | Cat#A31571; RRID:AB_162542       |
| goat anti-mouse AlexaFluor 488                                                                                     | Invitrogen                           | Cat#A32723; RRID:AB_2633275      |
| Chemicals, peptides, and recombinant proteins                                                                      |                                      |                                  |
| DPX                                                                                                                | Sigma-Aldrich                        | Cat#06522                        |
| all- <i>trans</i> -Retinal                                                                                         | Sigma-Aldrich                        | Cat#R2500                        |
| Mifepristone (RU-486)                                                                                              | Sigma-Aldrich                        | Cat#475838-50MG                  |
| Experimental models: Organisms/strains                                                                             |                                      |                                  |
| Canton S                                                                                                           | Duckhorn et al. <sup>9</sup>         | N/A                              |
| <i>w</i> <sup>1118</sup>                                                                                           | Duckhorn et al. <sup>9</sup>         | N/A                              |
| <i>dsx</i> <sup>LexA::p65</sup> / <i>TM6B</i>                                                                      | Zhou et al. <sup>33</sup>            | N/A                              |
| <i>dsf</i> <sup>Gal4</sup> / <i>CyO</i>                                                                            | Duckhorn et al. <sup>9</sup>         | N/A                              |
| <i>pJFRC29-10XUAS-IVS-myr::GFP-p10 (attP2)</i>                                                                     | Janelia Research Campus (JRC), HHMI  | N/A                              |
| <i>pJFRC12-10XUAS-IVS-myr::GFP (attP2)</i>                                                                         | JRC                                  |                                  |
| <i>pJFRC79-8XLexAop-2-FlpL (attP40)</i>                                                                            | JRC                                  | N/A                              |
| <i>pJFRC41-10XUAS-FRT-STOP-FRT-myr::gfp (su(Hw)attP1)</i>                                                          | JRC                                  | N/A                              |
| <i>pJFRC108-20XUAS-IVS-hPR-Flp-p10 (attP2)</i>                                                                     | JRC                                  | N/A                              |
| <i>pJFRC40-13XLexAop-FRT-STOP-FRT-myr::gfp (attP40)</i>                                                            | JRC                                  | N/A                              |
| <i>pJFRC56-10XUAS-FRT-STOP-FRT-kir2.1::gfp (attP2)</i>                                                             | JRC                                  | N/A                              |
| <i>pBPhsFlp2::PEST (attP3)</i>                                                                                     | JRC                                  | N/A                              |
| <i>pJFRC201-10XUAS-FRT-STOP-FRT-myr::smGFP-HA (VK0005)</i>                                                         | JRC                                  | N/A                              |
| <i>pJFRC240-10XUAS-FRT&gt;STOP&gt;FRTmyr::smGFP-V5-THS-10XUAS-FRT&gt;STOP&gt;FRT-myr::smGFP-FLAG (su(Hw)attP1)</i> | JRC                                  | N/A                              |
| <i>20XUAS-FRT&gt;STOP&gt;FRT-CsChrimson::mVenus (VK5)</i>                                                          | JRC                                  | N/A                              |

|                                    |                              |                                                                                                             |
|------------------------------------|------------------------------|-------------------------------------------------------------------------------------------------------------|
| <i>VT026005-Zp::GDBD (attP2)</i>   | JRC                          | N/A                                                                                                         |
| <i>UAS-P35<sup>BH1</sup></i>       | BDSC                         | RRID:BDSC_5072                                                                                              |
| <i>UAS-dsx_ShmiR (attP2)</i>       | Duckhorn et al. <sup>9</sup> | RRID:BDSC_35645                                                                                             |
| <i>UAS-dsf_ShmiR (attP2)</i>       | Duckhorn et al. <sup>9</sup> | N/A                                                                                                         |
| <i>dsf<sup>Del</sup></i>           | Duckhorn et al. <sup>9</sup> | N/A                                                                                                         |
| <i>dsf<sup>p65AD::Zp/CyO</sup></i> | This study                   | N/A                                                                                                         |
| <i>dsf<sup>pBD::Zp/CyO</sup></i>   | This study                   | N/A                                                                                                         |
| <i>dsf<sup>LexA::p65/CyO</sup></i> | This study                   | N/A                                                                                                         |
| Software and algorithms            |                              |                                                                                                             |
| Fiji                               | NIH, USA                     | <a href="https://imagej.net/fiji">https://imagej.net/fiji</a>                                               |
| MATLAB                             | Mathworks                    | <a href="https://www.mathworks.com/products/matlab.html">https://www.mathworks.com/products/matlab.html</a> |

438

## RESOURCE AVAILABILITY

### 440 Lead contact

442 Further information and requests for resources and reagents should be directed to and will be fulfilled by the lead contact, Troy Shirangi (troy.shirangi@villanova.edu).

### 444 Materials availability

Fly lines generated in this study are available from the lead contact.

446

### Data and code availability

448 All data reported in this paper will be shared by the lead contact upon request. This paper does not report original code. Any additional information required to reanalyze the data reported in this paper is available from the lead contact upon request.

## 452 EXPERIMENTAL MODEL AND SUBJECT DETAILS

*Drosophila melanogaster* stocks were maintained on standard cornmeal and molasses food at 25°C and ~50% humidity in a 12-hr light/dark cycle unless otherwise noted. Fly stocks used in this study are listed in the Key Resources Table. *dsf<sup>p65AD::Zp</sup>*, *dsf<sup>Zp::GDBD</sup>*, and *dsf<sup>LexA::p65</sup>* alleles were generated using the same strategy as that used to build the *dsf<sup>Gal4</sup>* allele<sup>9</sup> except the Gal4 sequence in the donor construct was replaced with sequences encoding *p65AD::Zp*, *Zp::GDBD*, or *LexA::p65*.

458

## METHOD DETAILS

### 460 Immunohistochemistry



Nervous systems were dissected in 1X phosphate-buffered saline (PBS), fixed in 4% paraformaldehyde in  
462 PBS for 35 minutes, then rinsed and washed in PBT (PBS with 1% Triton X-100). If a blocking step was  
performed, nervous systems were incubated in 5% normal goat serum or 5% normal donkey serum in  
464 PBT for 30 minutes. Tissues were then incubated with primary antibodies diluted in PBT or PBT with  
block overnight at 4°C. The next day, three washes were performed over the course of several hours  
466 before nervous systems were incubated in secondary antibodies diluted in PBT or PBT with block  
overnight at 4°C. Tissues were then washed three times over the course of several hours and placed on  
468 cover slips coated in poly-lysine, dehydrated in an increasing ethanol concentration series, and cleared in  
a xylene series. Nervous systems were mounted onto slides using DPX mounting medium and imaged on  
470 a Leica TCS SP8 Confocal Microscope at 40X magnification. For MultiColor FlpOut experiments, vials  
containing larvae aged between first and second instars (or 3–4-day old adults) were placed in a 37°C  
472 water bath for 1–10 minutes then dissected 2 days later. To stochastically label the DDAG neurons, male  
and female adults (deprived of food overnight) were placed in vials with food containing 100mM  
474 mifepristone (RU-486; Sigma 475838-50MG) for 2 hours and kept in darkness. Flies were then transferred  
back to vials containing untreated food for 3 days before their VNCs were dissected for staining. For  
476 immortalization experiments using mifepristone, three days after crosses were set-up on normal food, 60  
µL of 100mM RU-486 was added directly to the food and larvae were raised in darkness on RU-486-  
478 treated food until pupariation. Pupae were collected and transferred to vials containing untreated food  
before eclosure. Control groups were also kept in darkness but were treated with 60 µL of ethanol instead  
480 of RU-486. Adult nervous systems were dissected in PBS. The following primary antibodies were used:  
rabbit anti-GFP (Invitrogen #A11122; 1:1000), rat anti-DN-cadherin (DN-Ex#8, Developmental Studies  
482 Hybridoma Bank; 1:50), anti-DSX-F (1:200)<sup>32</sup>, mouse anti-HA.11 (BioLegend #MMS-101P; 1:250), and rat  
anti-FLAG (Novus Biologicals #NBP1-06712; 1:200). The following secondary antibodies were used:  
484 Fluorescein (FITC) conjugated donkey anti-rabbit (Jackson ImmunoResearch #711-095-152; 1:500), AF-647  
goat anti-rat (Invitrogen #A21247; 1:500), AF-568 donkey anti-rat (Invitrogen #A78946; 1:500), AF-647  
486 donkey anti-mouse (Invitrogen #A31571; 1:500), AF-488 goat anti-mouse (Invitrogen #A32723), AF-647  
goat anti-rat (Invitrogen #A21247; 1:500).

488

### **Optogenetic assays**

490 Unmated females used in optogenetic assays were raised in darkness and on food containing 0.2mM all-  
trans-retinal (sigma-Aldrich #R2500) and were incubated at 25°C and ~50% humidity. Once collected,  
492 unmated females were grouped in vials consisting of 15–20 flies for 8–12 days before testing. Flies were

anesthetized on ice for ~2 minutes, decapitated under low-intensity light, and were given 15–20 minutes  
494 to recover before being transferred to individual behavioral chambers (diameter: 10 mm, height: 3 mm). A  
FLIR Blackfly S USB3, BFS-U3-31S4M-C camera with a 800 nm long-pass filter (Thorlabs, FEL0800) was  
496 used to record optogenetic videos in SpinView. Upon testing, chambers were placed on top of an LED  
panel with continuous infrared (850 nm) light and recurring photoactivating red (635 nm) light using an  
498 Arduino script. To measure change in abdominal length before and during vaginal plate opening or  
ovipositor extrusion, a ruler (cm/mm) was included in the frame to set the scale. The change in abdominal  
500 length was calculated as the difference in the abdominal length from the base of the scutellum to the tip  
of the abdomen before and during photoactivation. Behavior indices were measured by calculating the  
502 average fraction of time spent performing the behavior during the first three 15-second lights-on periods  
and the first three 45-second light-off periods. For stochastic optogenetic activation, unmated females  
504 carrying *hs-Flp*, *UAS-frt.stop-CsChrimson::mVenus*, and the Split-Gal4 were reared on retinal-containing  
food, grouped in vials consisting of 15–20 flies, and aged for ~3 days before being placed in a 37°C water  
506 bath for periods ranging from 20–60 minutes. Females were then transferred to new vials containing  
retinal food and aged for an additional 5 days before being tested in an optogenetic activation experiment  
508 as described above. Following optogenetics, the VNC of each female was dissected and placed singly in  
wells of a 60-well mini tray (Fischer Scientific #12-565-155) for staining. Each VNC was subsequently  
510 mapped to the female in the optogenetics experiment from which the VNC was obtained.

## 512 Behavioral assays

Unmated females and males were collected under CO<sub>2</sub> and aged for 7–10 days in a 12-hour  
514 light/dark cycle and incubated at 25°C and ~50% humidity. Unmated females were group-housed in vials  
consisting of 15–20 flies, and *Canton S* males were individually housed. Courtship assays were done  
516 within the first two hours of the subjective day. Unmated females and *Canton S* males were transferred to  
individual behavioral chambers (diameter: 10 mm, height: 3 mm) and recorded for 30 minutes using a  
518 Sony Vixia HFR700 video camera at 25°C under white light. For experiments using mated females,  
unmated females were housed with males for 24 hours, anesthetized on ice for ~2 minutes, and mated  
520 females were collected into a new vial and given 30 minutes to recover. Mated females and *Canton S*  
males were loaded to chambers and recorded as described above. Courtship index was measured as the  
522 total time the male performed courtship behaviors divided by the total recording time. Courtship index  
was measured as the total time the male performed courtship behaviors divided by the observation time  
524 which was usually about 5 minutes. Vaginal plate opening (vpo) and ovipositor extrusion (oe) frequency

was measured as the total number of times a female performed a vpo or oe in a 6-min period of active  
526 male courtship. Egg laying was measured by allowing females to mate with males before transferring  
them to individual vials to for 24 hours. The total number of eggs laid in 24 hours by each female was  
528 then counted.

## 530 QUANTIFICATION AND STATISTICAL ANALYSIS

Data were analyzed using one-way ANOVA with Tukey-Kramer tests for multiple comparisons, Rank  
532 Sum tests, or Logrank tests. All p-values were measured in MATLAB.

### 534 Legends for Supplemental Videos

- Video S1. Anatomy of the DDAG\_B, DDAG\_C, DDAG\_D, and A26g neurons, Related to Figure 2.
- 536 Video S2. Optogenetic activation of the DDAG\_B–D neurons in unmated females, Related to Figure 2.
- Video S3. Optogenetic activation of the DDAG\_B–D neurons in mated females, Related to Figure 2.
- 538 Video S4. Bilateral optogenetic activation of the DDAG\_C neurons in unmated females, Related to  
Figure 2.
- 540 Video S5. Bilateral optogenetic activation of the DDAG\_D neurons in unmated females, Related to  
Figure 2.
- 542 Video S6. Unilateral optogenetic activation of a DDAG\_C neuron in unmated females, Related to  
Figure 2.
- 544 Video S7. Unilateral optogenetic activation of a DDAG\_D neuron in unmated females, Related to  
Figure 2.
- 546 Video S8. Unilateral optogenetic activation of a DDAG\_B neuron in unmated females, Related to  
Figure 2.
- 548 Video S9. Bilateral optogenetic activation of the DDAG\_B neurons in unmated females, Related to  
Figure 2.
- 550 Video S10. Optogenetic activation of a *dsf<sup>65AD::Zp</sup> ∩ VT026005-Zp::GDBD > CsChrimson::mVenus* male  
with depleted *dsx* transcripts, Related to Figure 5.
- 552 Video S11. Optogenetic activation of a *dsf<sup>65AD::Zp</sup> ∩ VT026005-Zp::GDBD > CsChrimson::mVenus*  
unmated female with depleted *dsx* transcripts, Related to Figure 5.
- 554 Video S12. Optogenetic activation of a *dsf<sup>65AD::Zp</sup> ∩ VT026005-Zp::GDBD > CsChrimson::mVenus*  
unmated female with depleted *dsf* transcripts, Related to Figure 5.

556

## REFERENCES

- 558
1. Sisk, C.L., and Zehr, J.L. (2005). Pubertal hormones organize the adolescent brain and behavior. *Front Neuroendocrinol* 26, 163–174. 10.1016/j.yfrne.2005.10.003.
- 560
2. Ahmed, E.I., Zehr, J.L., Schulz, K.M., Lorenz, B.H., DonCarlos, L.L., and Sisk, C.L. (2008). Pubertal hormones modulate the addition of new cells to sexually dimorphic brain regions. *Nat Neurosci* 11, 995–997. 10.1038/nn.2178.
- 562
3. Truman, J.W., Price, J., Miyares, R.L., and Lee, T. (2023). Metamorphosis of memory circuits in *Drosophila* reveals a strategy for evolving a larval brain. *Elife* 12, e80594. 10.7554/eLife.80594.
- 564
4. Witvliet, D., Mulcahy, B., Mitchell, J.K., Meirovitch, Y., Berger, D.R., Wu, Y., Liu, Y., Koh, W.X., Parvathala, R., Holmyard, D., et al. (2021). Connectomes across development reveal principles of brain maturation. *Nature* 596, 257–261. 10.1038/s41586-021-03778-8.
- 566
5. Truman, J.W., and Riddiford, L.M. (2023). *Drosophila* postembryonic nervous system development: a model for the endocrine control of development. *Genetics* 223, iyac184. 10.1093/genetics/iyac184.
- 568
6. Carreira-Rosario, A., Zarin, A.A., Clark, M.Q., Manning, L., Fetter, R.D., Cardona, A., and Doe, C.Q. (2018). MDN brain descending neurons coordinately activate backward and inhibit forward locomotion. *Elife* 7, e38554. 10.7554/eLife.38554.
- 570
7. Cacherero, S., Ostrovsky, A.D., Yu, J.Y., Dickson, B.J., and Jefferis, G.S.X.E. (2010). Sexual dimorphism in the fly brain. *Curr Biol* 20, 1589–1601. 10.1016/j.cub.2010.07.045.
- 572
8. Ren, Q., Awasaki, T., Huang, Y.-F., Liu, Z., and Lee, T. (2016). Cell Class-Lineage Analysis Reveals Sexually Dimorphic Lineage Compositions in the *Drosophila* Brain. *Curr Biol* 26, 2583–2593. 10.1016/j.cub.2016.07.086.
- 574
9. Duckhorn, J.C., Cande, J., Metkus, M.C., Song, H., Altamirano, S., Stern, D.L., and Shirangi, T.R. (2022). Regulation of *Drosophila* courtship behavior by the *Tlx/tailless*-like nuclear receptor, dissatisfaction. *Curr Biol* 32, 1703-1714.e3. 10.1016/j.cub.2022.02.031.
- 576
10. Pan, Y., Robinett, C.C., and Baker, B.S. (2011). Turning males on: activation of male courtship behavior in *Drosophila melanogaster*. *PLoS One* 6, e21144. 10.1371/journal.pone.0021144.
- 578
11. Harris, R.M., Pfeiffer, B.D., Rubin, G.M., and Truman, J.W. (2015). Neuron hemilineages provide the functional ground plan for the *Drosophila* ventral nervous system. *Elife* 4, e04493. 10.7554/eLife.04493.
- 580
12. Nern, A., Pfeiffer, B.D., and Rubin, G.M. (2015). Optimized tools for multicolor stochastic labeling reveal diverse stereotyped cell arrangements in the fly visual system. *Proc Natl Acad Sci U S A* 112, E2967-2976. 10.1073/pnas.1506763112.
- 582
13. Wang, K., Wang, F., Forknall, N., Yang, T., Patrick, C., Parekh, R., and Dickson, B.J. (2021). Neural circuit mechanisms of sexual receptivity in *Drosophila* females. *Nature* 589, 577–581. 10.1038/s41586-020-2972-7.
- 584
- 586
- 588
- 590

- 592 14. Mezzera, C., Brotas, M., Gaspar, M., Pavlou, H.J., Goodwin, S.F., and Vasconcelos, M.L. (2020).  
Ovipositor Extrusion Promotes the Transition from Courtship to Copulation and Signals Female  
594 Acceptance in *Drosophila melanogaster*. *Curr Biol* 30, 3736–3748.e5. 10.1016/j.cub.2020.06.071.
15. Wang, F., Wang, K., Forknall, N., Parekh, R., and Dickson, B.J. (2020). Circuit and Behavioral  
596 Mechanisms of Sexual Rejection by *Drosophila* Females. *Curr Biol* 30, 3749–3760.e3.  
10.1016/j.cub.2020.07.083.
- 598 16. Klapoetke, N.C., Murata, Y., Kim, S.S., Pulver, S.R., Birdsey-Benson, A., Cho, Y.K., Morimoto, T.K.,  
Chuong, A.S., Carpenter, E.J., Tian, Z., et al. (2014). Independent optical excitation of distinct neural  
600 populations. *Nat Methods* 11, 338–346. 10.1038/nmeth.2836.
17. Baines, R.A., Uhler, J.P., Thompson, A., Sweeney, S.T., and Bate, M. (2001). Altered electrical properties  
602 in *Drosophila* neurons developing without synaptic transmission. *J Neurosci* 21, 1523–1531.  
10.1523/JNEUROSCI.21-05-01523.2001.
- 604 18. Burtis, K.C., and Baker, B.S. (1989). *Drosophila* doublesex gene controls somatic sexual differentiation  
by producing alternatively spliced mRNAs encoding related sex-specific polypeptides. *Cell* 56, 997–  
606 1010. 10.1016/0092-8674(89)90633-8.
19. Oren-Suissa, M., Bayer, E.A., and Hobert, O. (2016). Sex-specific pruning of neuronal synapses in  
608 *Caenorhabditis elegans*. *Nature* 533, 206–211. 10.1038/nature17977.
20. Lee, G., Hall, J.C., and Park, J.H. (2002). Doublesex gene expression in the central nervous system of  
610 *Drosophila melanogaster*. *J Neurogenet* 16, 229–248. 10.1080/01677060216292.
21. Robinett, C.C., Vaughan, A.G., Knapp, J.-M., and Baker, B.S. (2010). Sex and the single cell. II. There is a  
612 time and place for sex. *PLoS Biol* 8, e1000365. 10.1371/journal.pbio.1000365.
22. Rideout, E.J., Dornan, A.J., Neville, M.C., Eadie, S., and Goodwin, S.F. (2010). Control of sexual  
614 differentiation and behavior by the doublesex gene in *Drosophila melanogaster*. *Nat Neurosci* 13, 458–  
466. 10.1038/nn.2515.
- 616 23. Truman, J.W., and Bate, M. (1988). Spatial and temporal patterns of neurogenesis in the central  
nervous system of *Drosophila melanogaster*. *Dev Biol* 125, 145–157. 10.1016/0012-1606(88)90067-x.
- 618 24. Taylor, B.J., and Truman, J.W. (1992). Commitment of abdominal neuroblasts in *Drosophila* to a male  
or female fate is dependent on genes of the sex-determining hierarchy. *Development* 114, 625–642.  
620 10.1242/dev.114.3.625.
25. Birkholz, O., Rickert, C., Berger, C., Urbach, R., and Technau, G.M. (2013). Neuroblast pattern and  
622 identity in the *Drosophila* tail region and role of doublesex in the survival of sex-specific precursors.  
*Development* 140, 1830–1842. 10.1242/dev.090043.
- 624 26. Truman, J.W., and Reiss, S.E. (1976). Dendritic reorganization of an identified motoneuron during  
metamorphosis of the tobacco hornworm moth. *Science* 192, 477–479. 10.1126/science.1257782.
- 626 27. Technau, G., and Heisenberg, M. (1982). Neural reorganization during metamorphosis of the corpora  
pedunculata in *Drosophila melanogaster*. *Nature* 295, 405–407. 10.1038/295405a0.

- 628 28. Williams, D.W., and Shepherd, D. (1999). Persistent larval sensory neurons in adult *Drosophila*  
melanogaster. *J Neurobiol* 39, 275–286.
- 630 29. Lee, K., and Doe, C.Q. (2021). A locomotor neural circuit persists and functions similarly in larvae and  
adult *Drosophila*. *Elife* 10, e69767. [10.7554/eLife.69767](https://doi.org/10.7554/eLife.69767).
- 632 30. Consoulas, C., Restifo, L.L., and Levine, R.B. (2002). Dendritic remodeling and growth of motoneurons  
during metamorphosis of *Drosophila melanogaster*. *J Neurosci* 22, 4906–4917. [10.1523/JNEUROSCI.22-](https://doi.org/10.1523/JNEUROSCI.22-12-04906.2002)  
634 [12-04906.2002](https://doi.org/10.1523/JNEUROSCI.22-12-04906.2002).
- 636 31. Sprecher, S.G., and Desplan, C. (2008). Switch of rhodopsin expression in terminally differentiated  
*Drosophila* sensory neurons. *Nature* 454, 533–537. [10.1038/nature07062](https://doi.org/10.1038/nature07062).
- 638 32. Peng, Q., Chen, J., Su, X., Wang, R., Han, C., and Pan, Y. (2022). The sex determination gene doublesex  
is required during adulthood to maintain sexual orientation. *J Genet Genomics* 49, 165–168.  
[10.1016/j.jgg.2021.08.006](https://doi.org/10.1016/j.jgg.2021.08.006).
- 640 33. Zhou, C., Pan, Y., Robinett, C.C., Meissner, G.W., and Baker, B.S. (2014). Central brain neurons  
expressing doublesex regulate female receptivity in *Drosophila*. *Neuron* 83, 149–163.  
642 [10.1016/j.neuron.2014.05.038](https://doi.org/10.1016/j.neuron.2014.05.038).

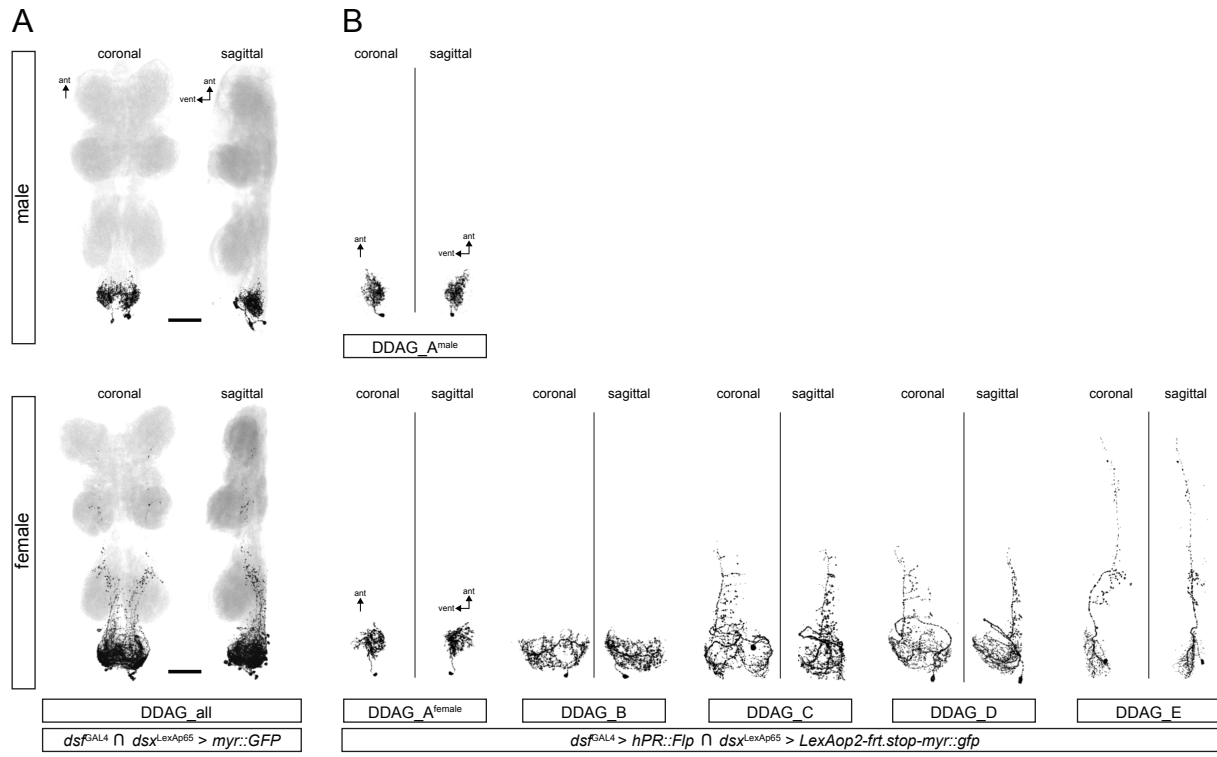

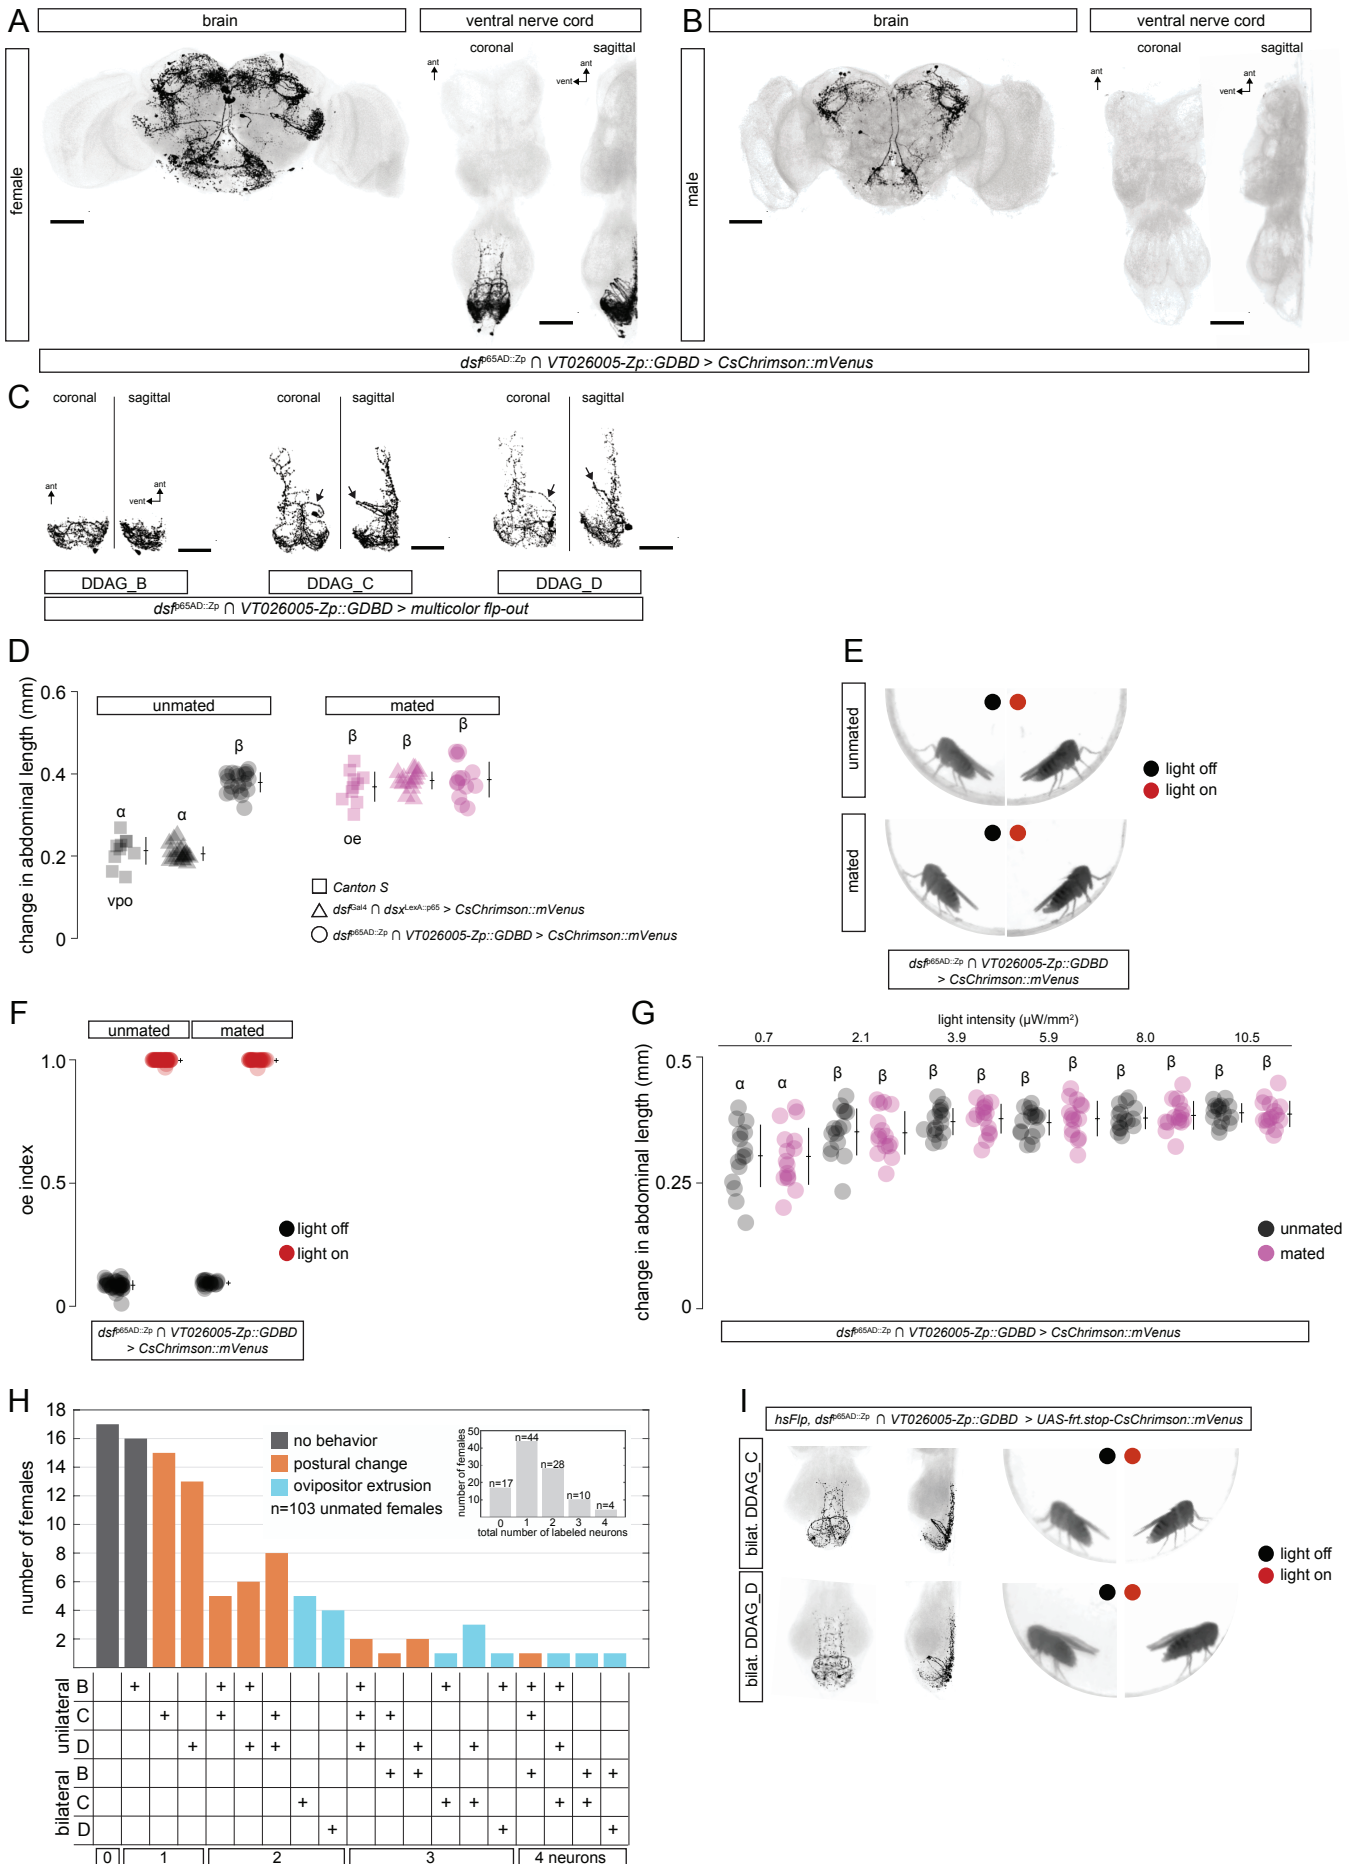



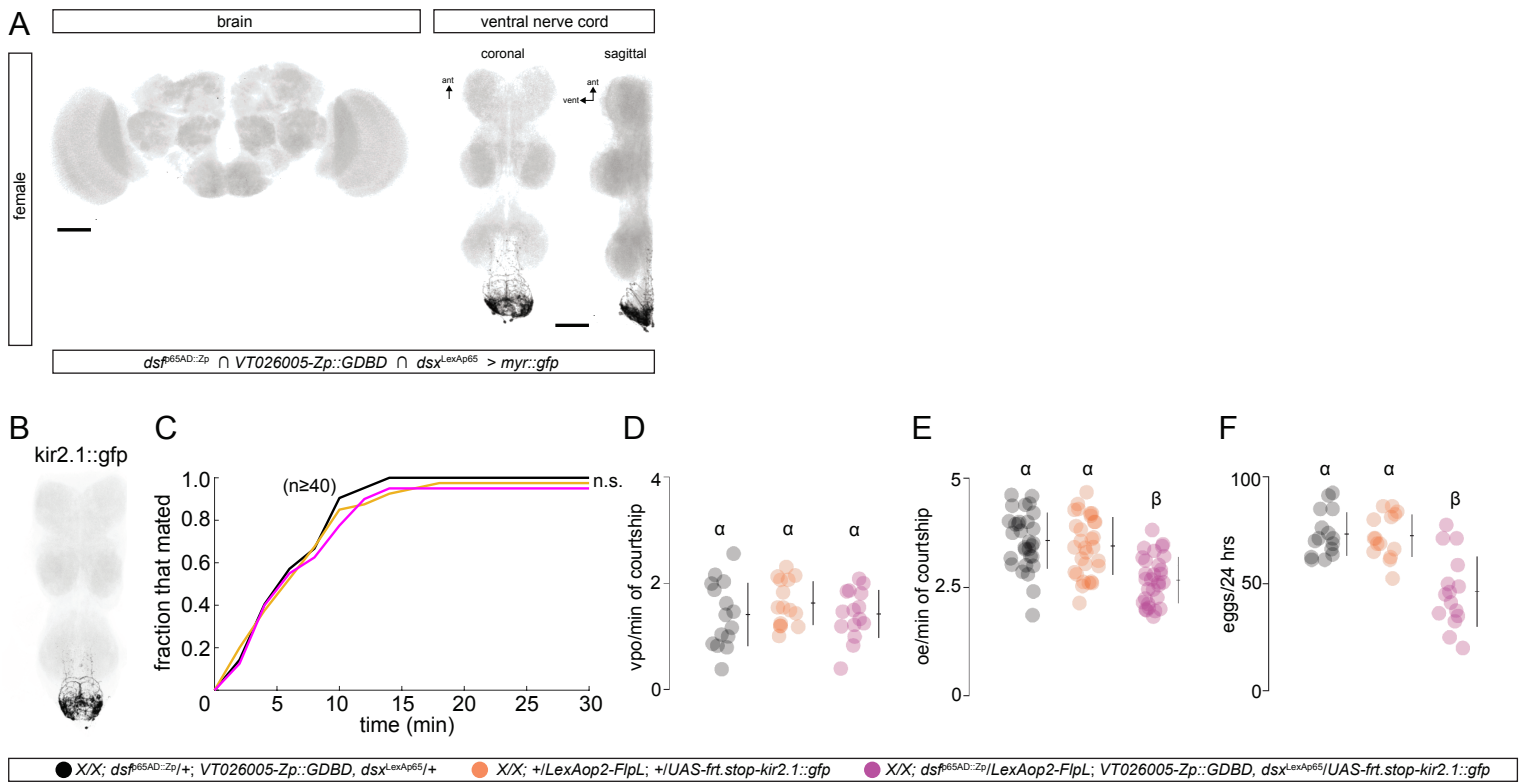

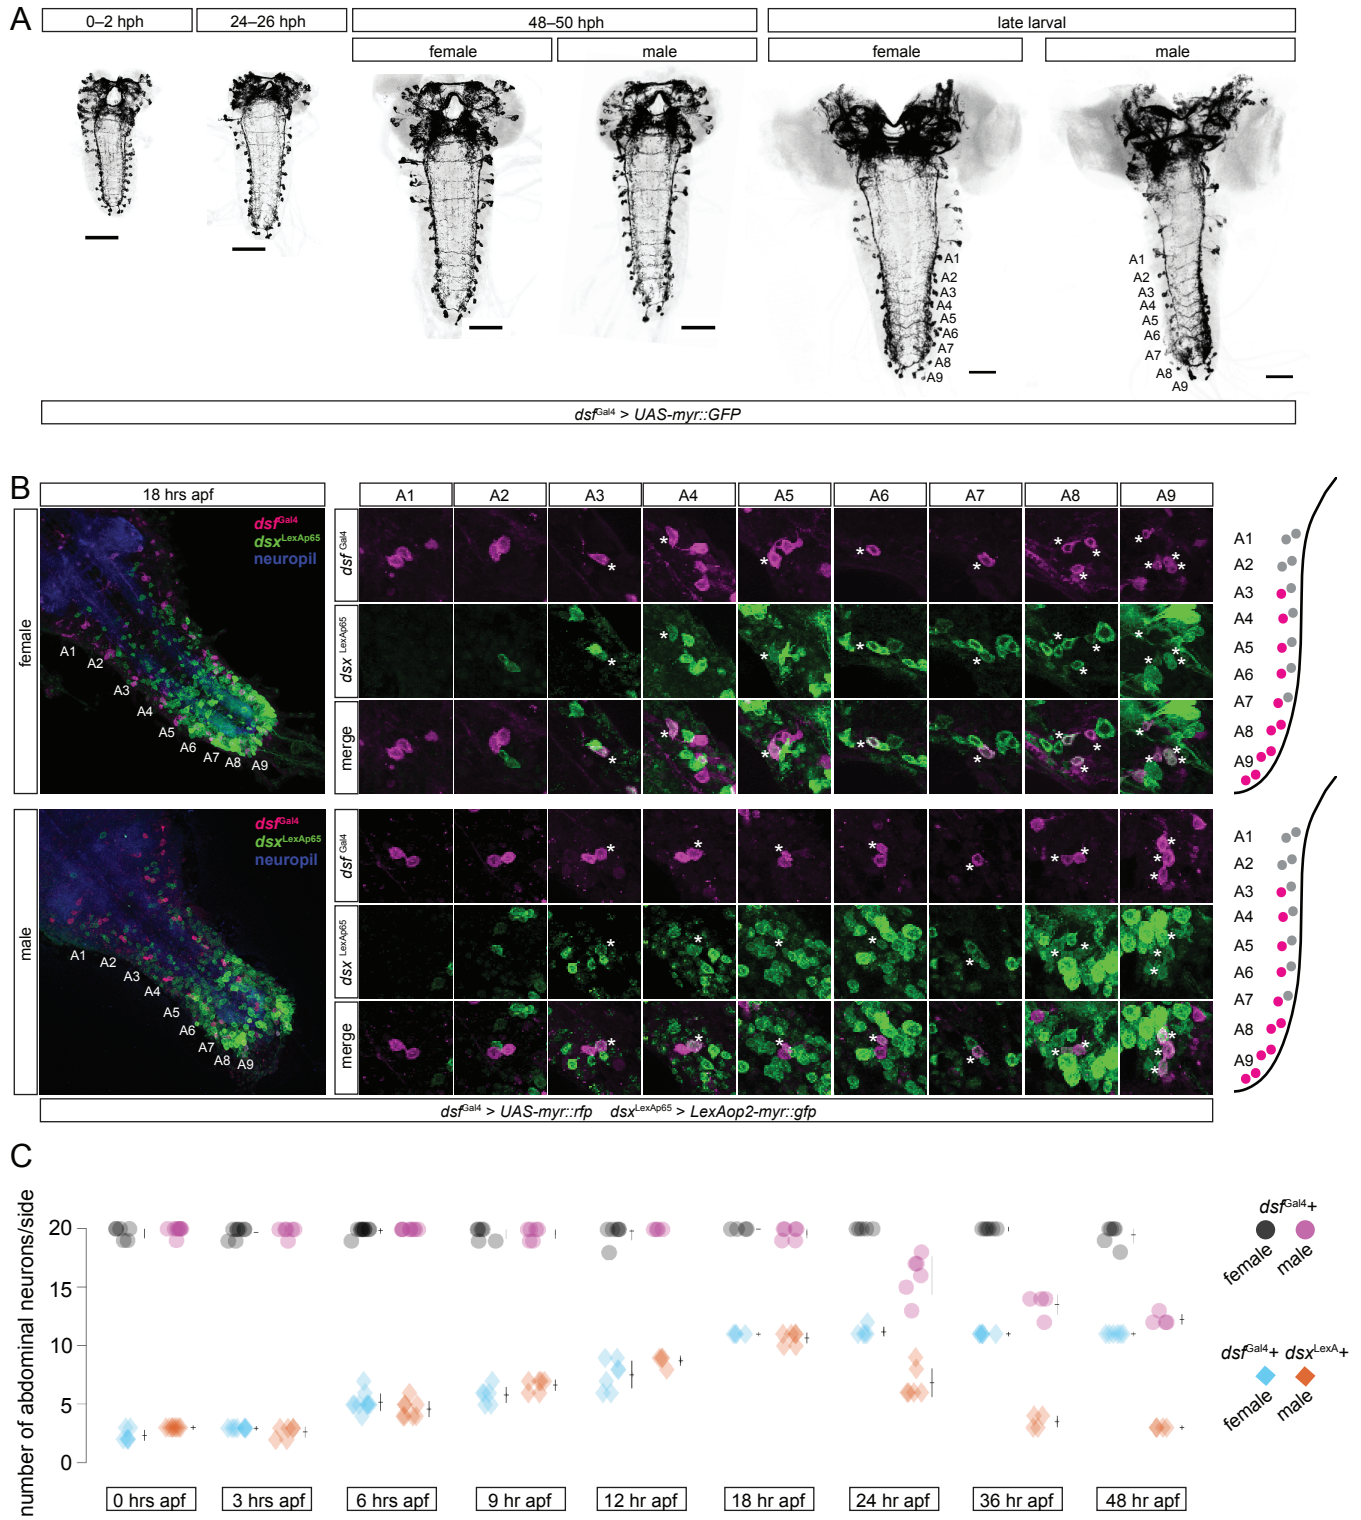

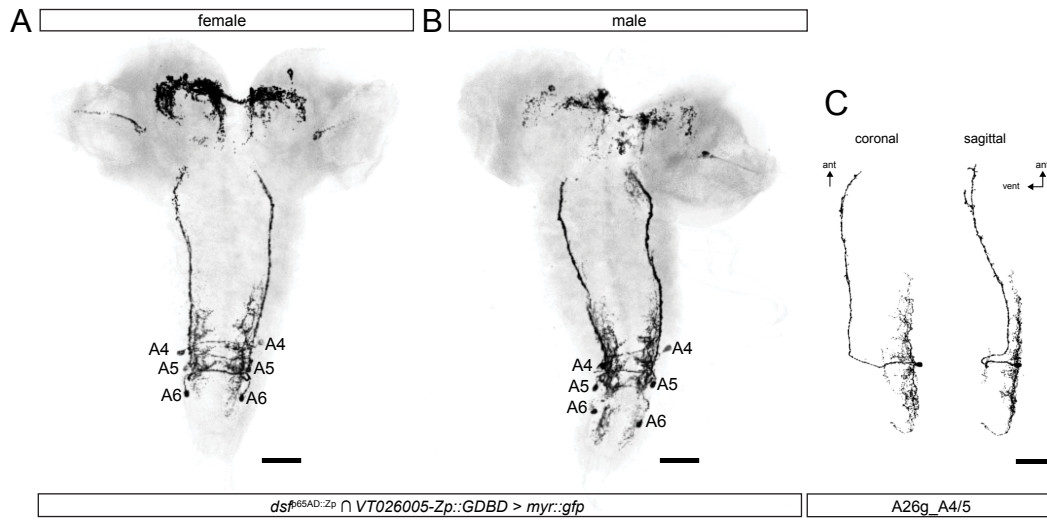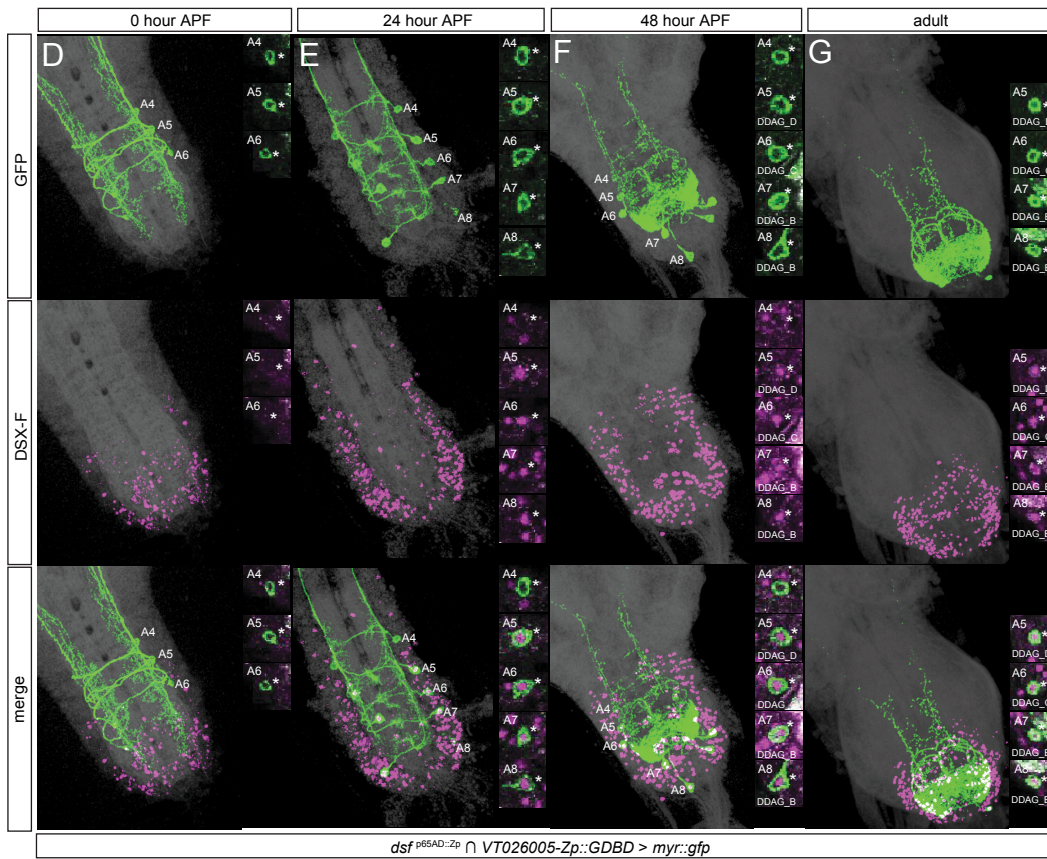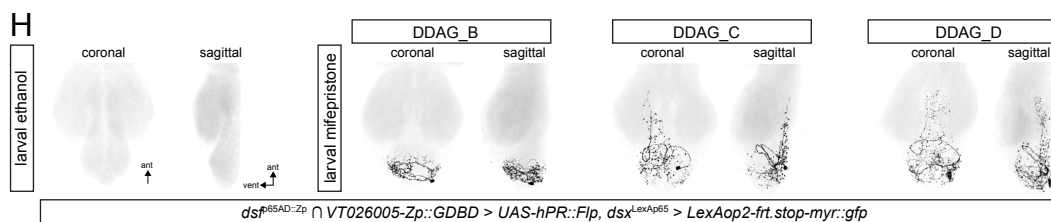

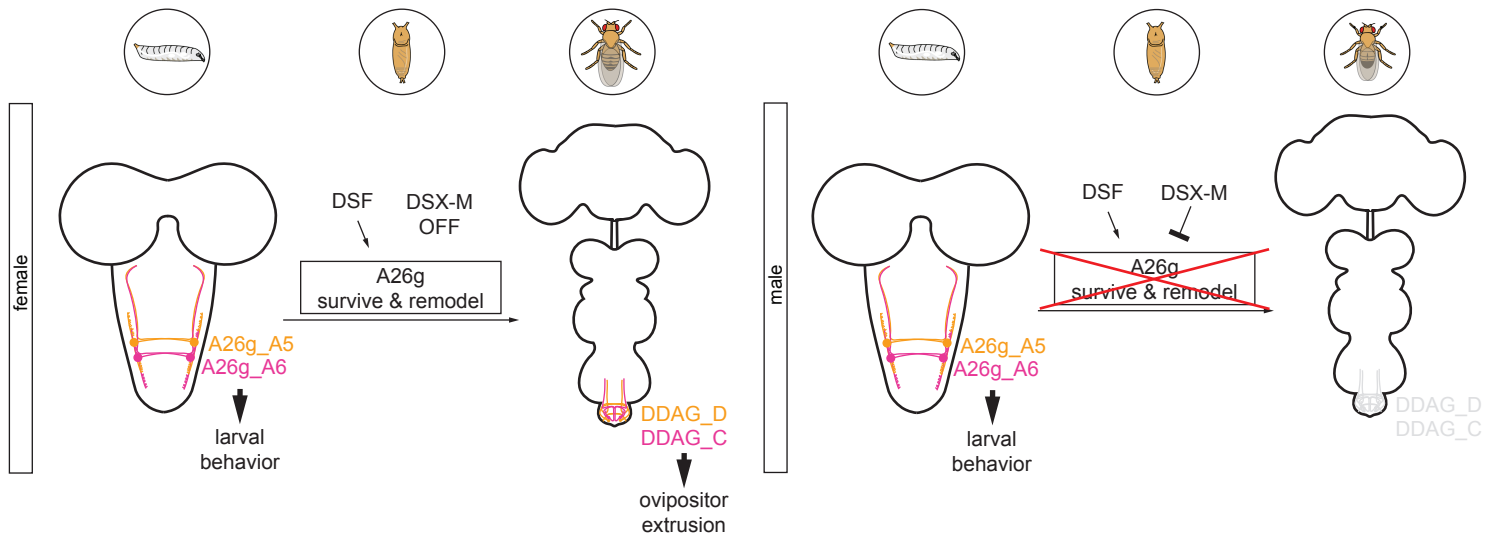

Source: https://www.biorxiv.org/content/biorxiv/early/2024/01/06/2023.11.30.569472.full.pdf
